# Supplementary material
Source: PubMed Central journal article supplement (PMC9973028)
Supplement: aem.01701-22-s0001.pdf [file aem.01701-22-s0001.pdf]

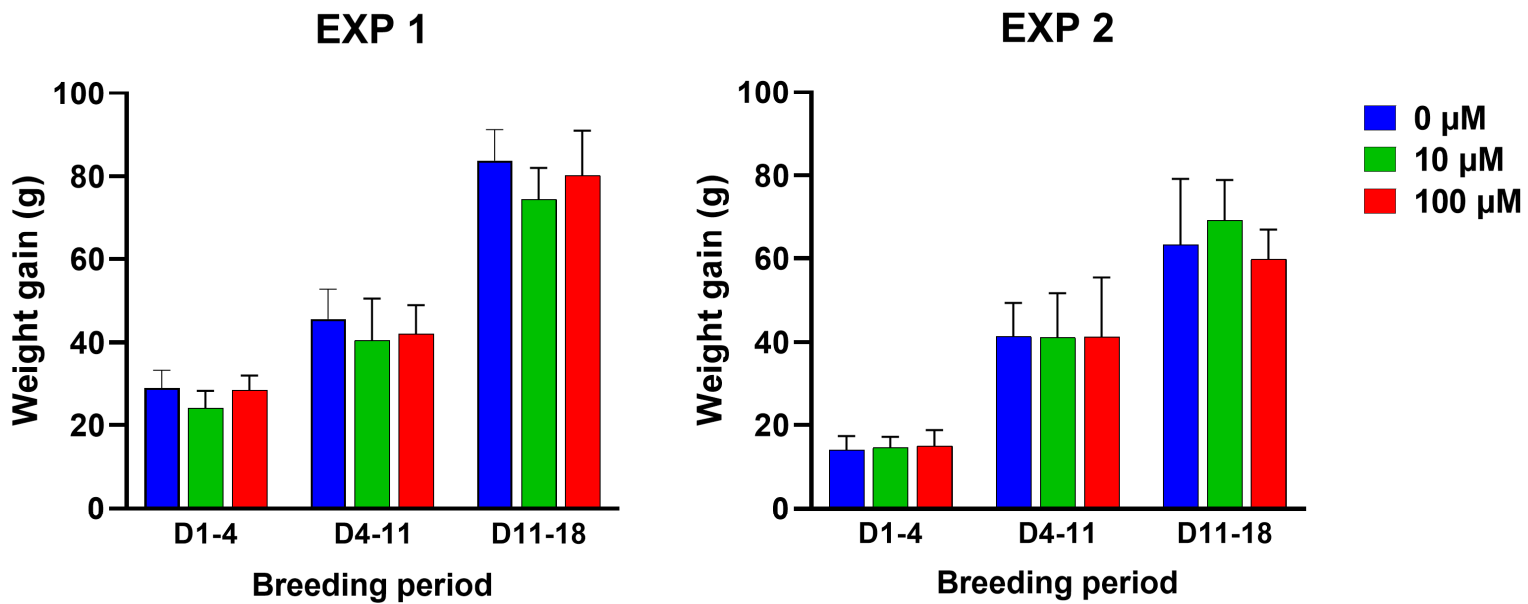

Fig. S1. The effect of TRP on the body weight gain of chicks. The chicks were weighed at 1, 4, 11, and 18 days old, and the body weight gains were calculated in chick infection experiments 1 and 2. Mean values and SDs were obtained from eight chicks per group up to 11 days old and from four chicks per group at 11 to 18 days old.
